# Supplementary material
Source: PubMed Central journal article supplement (PMC3365155)
Supplement: 1201327109_pnas.201201327SI.pdf [file 1201327109_pnas.201201327SI.pdf]

# Supporting Information

Rajani et al. 10.1073/pnas.1201327109

## SI Materials and Methods

**Cell Culture.** HeLa, Jurkat, K562, 721.221, and NK-92(MI) cells were obtained from ATCC. HeLa cells were maintained in DMEM plus 10% (vol/vol) heat-inactivated FCS plus supplement (100 U/mL penicillin G, 100 µg/mL streptomycin sulfate, 6 mM Hepes-free acid, 1.6 mM L-glutamine, 50 µM β-mercaptoethanol) (D10). Jurkat, 721.221, and K562 cells were maintained in RPMI-1640 plus 10% (vol/vol) heat-inactivated FCS with supplement (K10). NK-92(MI) cells were maintained in RPMI-1640 plus 10% (vol/vol) heat-inactivated human AB serum plus supplement.

**Reagents/Antibodies.** The following antibodies were used for immunoblotting and/or immunofluorescence: mouse antibodies to β-actin (JLA20; EMD Bioscience; 1/1,000), caspase 3 (3G2; Cell Signaling Technology; 1/1,000), heterogeneous nuclear ribonucleoprotein (hnRNP) A1 (4B10; Sigma; 1/5,000 for Western blotting; 1/2,000 for immunofluorescence), hnRNP A2/B1 (DP3B3; Sigma; 1/2,000), hnRNP C1/C2 (4F4; Sigma 1/5,000), hnRNP U (3G6; Santa Cruz Biotechnology; 1/1,000), lamin A/C (BD Biosciences; 1/1,000), tubulin-α (B5-1-2; Sigma; 1/5,000), and c-Fos (2G9C3; Abcam; 1/2,000); rat antisera to HA (3F10; Roche; 1/2,000) and BrdU (BU1/75; Abcam; 1/500); rabbit antisera to PARP-1/2 (H-250; Santa Cruz Biotechnology; 1/1,000), SET [Lieberman antibody (1); 1/1000], and c-Jun (Santa Cruz Biotechnology; 1/1,000); goat antisera to GST (GE; 1/2,000) and Ku80 (Santa Cruz Biotechnology; 1/1,000). Secondary antibodies were sheep anti-mouse-HRP (GE; 1/2,000), donkey anti-rabbit-HRP (GE, 1/2000), donkey anti-goat-HRP (Santa Cruz Biotechnology, 1/1,000), donkey anti-rat-HRP (Zymed; 1/2,000), donkey anti-mouse-488 (Invitrogen; 1/5,000), donkey anti-mouse-647 (Invitrogen; 1/2,000), donkey anti-rat-488 (Invitrogen; 1/5,000). Rabbit anti-mouse IgG (Jackson Immunoresearch), mouse IgG (Jackson Immunoresearch), and protein A-agarose beads (Roche) were used for immunoprecipitation. Mouse anti-Fas (CH11; Immunotech) was used at 1 µg/mL final concentration. Doxorubicin hydrochloride was from Fluka. zVAD-fmk was from Calbiochem. Recombinant granzyme A (GzmA) and catalytically inactive granzyme A (S-AGzmA) were purified from *Escherichia coli* as previously described (1, 2). Native granzyme B (GzmB) was purified from YT-Indy natural killer (NK) cells as previously described (3). Native rat PFN was purified from ascites fluid as previously described (1). Recombinant granzymes (Gzms) generated in a recently introduced mammalian expression system for high-yield protein (4) were used in experiments in Fig. 5 and Figs. S2C and S5. Briefly, GzmA or GzmB cDNA was cloned into pHlseq (kind gift of Yvonne Jones, University of Oxford, Oxford, UK) at the AgeI and KpnI sites using the forward primers 5'GAAACCGGTGACGACGACGACAAGATTATTGGAGG-AAATGAA for GzmA and 5'GAAACCGGTGACGACGACGACAAGATCATCGGGGACATGAG for GzmB (introducing enterokinase sites before the N terminus of the active proteases) and the reverse primers 5'GTGCTTGGTACCAACTGCTCCCTTGATAGTCATAAT for GzmA and 5'GTGCTTGGTACCGTAGCGTTTCATGGTTTTCTT for GzmB. The plasmid was transfected into 293T cells by calcium phosphate precipitation. The transfected cells were grown in serum-free medium (ExCell 293; Sigma) for 4 d. Recombinant protein in culture supernatants was purified by immobilized metal affinity chromatography using Nickel-NTA (Qiagen) following the manufacturer's instructions. Eluted granzymes were treated with enterokinase (0.05 IU/mL supernatant) (Sigma) for 16 h at room temperature. Active Gzms

were purified on an S column, concentrated, and quality tested as previously described (5).

**Cell Fractionation.** K562 cells, maintained in exponential phase, were harvested by centrifugation at 400 × g for 10 min. The cell pellet was washed 3× in PBS, resuspended in 5× pellet volume of Buffer A [10 mM Tris (pH 7.9), 1.5 mM MgCl<sub>2</sub>, 10 mM KCl, 0.2 mM EDTA], and incubated on ice for 30 min. Cells were disrupted (as monitored by trypan blue staining) by three strokes of a Dounce homogenizer on ice, and intact cells were pelleted by centrifugation (100 × g, 30 s, 4 °C). The supernatant then was centrifuged at 16,000 × g for 1 min at 4 °C. The nuclear pellet was washed 3× with 5 mL cold Buffer A, centrifuged at 16,000 × g for 30 s, and resuspended in 0.5–1 mL PBS plus 1 mM MgCl<sub>2</sub> (PBS+Mg). Cytosolic supernatant was clarified further by centrifugation at 16,000 × g for 10 min to remove organelles and insoluble material. Protein content was determined using the Pierce BCA Assay. HeLa cells, transfected 18 h earlier in six-well tissue-culture plates using 2 µg DNA and 5 µL Lipofectamine 2000 (Invitrogen), were washed three times in PBS before fractionation according to ref. 6. Two micrograms of total protein were resolved per lane by SDS/PAGE. After Gzm and PFN treatment, HeLa cells were harvested by centrifugation at 400 × g for 3 min at 4 °C. The cell pellet was resuspended gently in 150 µL RNase-free fractionation buffer (PARIS Kit; Ambion) and kept on ice for 5 min. Nuclei were pelleted by spinning at 500 × g for 3 min at 4 °C. The nuclear pellet was resuspended in 125 µL fractionation buffer and centrifuged immediately at 500 × g for 1 min at 4 °C. After 25 µL was saved for SDS/PAGE analysis to confirm the fractionation, the pooled supernatant was mixed with 750 µL TRIZOL-LS (Invitrogen). The nuclear pellet was resuspended in 250 µL disruption buffer (PARIS Kit) and mixed with 750 µL TRIZOL-LS after samples were saved for protein analysis.

**Two-Dimensional Electrophoresis Sample Preparation.** Whole K562 nuclei (1–3 mg protein equivalents), suspended in PBS+Mg to a final concentration of 0.5 mg/mL, were left untreated or treated with 1 µM GzmA for 30 min at 37 °C. Reactions were stopped by adding 1 mM PMSF. Nuclei then were treated with 300 U/mL Benzonase (Sigma) for 30 min at room temperature. Nuclease activity was quenched by adding 10 mM EDTA for 5 min at room temperature. Nuclei then were harvested by centrifugation at 16,000 × g for 30 s at 4 °C, solubilized in 200–400 µL of 2D solubilization buffer [4% (wt/vol) CHAPS, 7 M urea, 2 M thiourea], and incubated on ice for 30 min before pulse sonication for 3 s using a Misonix S-4000 sonicator set to 30% maximum. Insoluble material was pelleted by Eppendorf microfuge Model 5415D at top speed for 30 min at room temperature. The supernatant was harvested, and protein was precipitated using the 2D Clean-up Kit (GE). Pellets were air dried before resuspension in 100 µL 2D solubilization buffer followed by incubation at 37 °C overnight. Protein concentration was determined using the R<sub>c</sub>D<sub>c</sub> Assay (Bio-Rad).

**Two-Dimensional Gel Electrophoresis.** Two hundred fifty micrograms of protein were diluted in 300 µL solubilization buffer containing 40 mM DTT and 0.2% carrier ampholytes (pH 3–10) (Bio-Rad). Samples were actively loaded under 50-µA current onto pH 3–10 nonlinear 17-cm ReadyStrip immobilized pH gradient strips (Bio-Rad) at 20 °C for 24 h. After 1 h hydration, strips were overlaid with mineral oil. After hydration was complete, strips were blotted with distilled water and placed in

a clean focusing tray with water-wetted electrode wicks in place. After mineral oil was layered on top of the strip, the focusing program was initiated (step 1: 250 V, linear slope, 1 h; step 2: 500 V, rapid slope, 1 h; step 3: 8,000 V, rapid slope, 60,000 Vh; 50  $\mu$ A limit/gel) using a Bio-Rad Protean isoelectric focusing cell. After isoelectric focusing, strips were reduced in 2D equilibration Buffer 1 [6 M urea, 375 mM Tris (pH 7.4), 2% (wt/vol) SDS, 2% (vol/vol) glycerol, 10 mg/mL DTT] for 10 min at room temperature. Buffer 1 was exchanged for Buffer 2 [6 M urea, 375 mM Tris (pH 7.4), 2% (wt/vol) SDS, 2% (vol/vol) glycerol, 25 mg/mL iodoacetamide] for 10 min at room temperature. Strips were cleaned in 1 $\times$  TGS [25 mM Tris (pH 8.6), 192 mM glycine, 0.1% SDS] before casting on top of a 17-cm 10% (wt/vol) PAGE gel with a 5% (wt/vol) polyacrylamide stacking gel. Focusing strips and molecular-weight markers (Bio-Rad) were cast in low-melt agarose with bromophenol blue (Bio-Rad) and placed at 4  $^{\circ}$ C until set, about 5 min. Second-dimension electrophoresis was performed at 150 V until the dye front was less than 0.5 cm from gel bottom. Gels were uncast and were silver stained using the SilverQuest staining kit (Invitrogen) using 200 mL solution per gel per staining step.

**Two-Dimensional Gel Image Analysis and Mass Spectrometry.** Silver-stained gels were scanned, and images were analyzed using RedFin Image analysis software (Ludesi). Spots that decreased at least 10-fold after GzmA treatment were chosen as hits if they matched unambiguously, based on nearby spots, and had a minimal volume of 100 in the untreated sample. Additional negatively stained spots (negative volume by RedFin) were added manually based on visual analysis of decreased volume after GzmA treatment. Chosen spots were excised, trypsin-digested in gel, and then analyzed on a nanoscale reverse-phase HPLC by electrospray ionization and LTQ linear ion-trap mass spectrometry at the Taplin Biological Mass Spectrometry Facility, Harvard Medical School.

**GzmA Treatment of Intact Nuclei.** Small-scale treatments were performed as above using 0.5 mg/mL protein equivalents of nuclei in PBS+Mg with the indicated dose of GzmA for the indicated time at 37  $^{\circ}$ C. Reactions were stopped by adding 10 mM PMSF and 5 $\times$  SDS loading buffer and boiling for 5 min.

**Gzm and Perforin Treatment.** K562 cells ( $5 \times 10^4$ ) or HeLa cells ( $2 \times 10^5$ ) in cell buffer (10 mM Hepes, 4 mM CaCl<sub>2</sub>, 0.4% BSA in HBSS) were treated for the indicated time at 37  $^{\circ}$ C with a sublytic concentration of rat perforin (PFN) (defined as the concentration that causes 5–15% cell death by propidium iodide staining in the absence of Gzms) and the indicated GzmA or GzmB concentration [prediluted in PFN buffer (10 mM Hepes in HBSS)]. Reactions were stopped by boiling in 5 $\times$  SDS loading buffer or by transfer to 4  $^{\circ}$ C before nuclear/cytoplasmic fractionation. Samples were resolved by SDS/PAGE and immunoblot. For caspase inhibition, cells were preincubated with 75  $\mu$ M of zVAD-fmk in loading buffer before Gzms and PFN were added. To assess cell death,  $2 \times 10^4$  cells were labeled with <sup>51</sup>Cr, and <sup>51</sup>Cr release was assessed after 4 h or were stained with annexin V and propidium iodide and analyzed 1 h after treatment by flow cytometry as previously described (5). Dead cells were defined as annexin V-positive and/or propidium iodide-positive.

**Cytotoxicity Assay.** 721.221 cells ( $5 \times 10^4$ ) were coincubated with NK-92 cells at an effector:target ratio of 5:1 for 4 h at 37  $^{\circ}$ C. At indicated times, cells were harvested by centrifugation (250  $\times$  g for 3 min) before lysis on ice in RIPA buffer [50 mM Tris-HCl (pH 7.4), 150 mM NaCl, 1% Triton X-100, 1% sodium deoxycholate, 0.1% SDS, 1 mM EDTA]. After 5 $\times$  SDS loading buffer was added, samples were boiled for 1 min and analyzed by SDS/PAGE and immunoblot.

**Immunopurification of hnRNP Complexes.** hnRNP complexes were purified as described (7). Immunoprecipitates were resuspended in 40  $\mu$ L of 2 $\times$  SDS sample buffer and analyzed by immunoblot or silver staining.

**Caspase Activation.** Jurkat cells ( $0.5 \times 10^6$ /mL in K10) were treated with 1  $\mu$ g/mL anti-Fas (CH11 mAb) or 1  $\mu$ M doxorubicin in the presence or absence of 75  $\mu$ M zVAD-fmk for the indicated time. HeLa cells were treated with 1 mM staurosporine for the indicated time. Cell death and caspase inhibition were verified by annexin V/propidium iodide staining. Cells were harvested and resuspended in RIPA buffer plus 5 $\times$  sample loading buffer containing  $\beta$ -mercaptoethanol.

**Recombinant hnRNP.** hnRNP genes were amplified from HeLa cDNA using primers that added 5'-EcoRI and 3'-NotI restriction sites for insertion into pGEX-4T1 (GE). Insertions were verified by sequencing. GST-hnRNP fusion proteins were purified from BL21(DE3) *E. coli* according to the supplier's instructions. Protein purity was assessed by Coomassie blue staining of SDS/PAGE gels.

**Cleavage Site Determination.** GST-hnRNP A1 was treated with increasing doses of GzmA and resolved on SDS/PAGE gels stained with Coomassie blue. Bands corresponding to cleavage fragments were excised, in-gel digested with chymotrypsin, and analyzed by mass spectrometry to identify GzmA cleavage sites.

**Construction of hnRNP A1 mutants.** Site-directed mutagenesis introduced point mutations of R196, R232, and R284 to alanine using the following primers:

R196A forward: 5'CATCCAGCCAAAGAGGTGCAAGTG-GTTCTGGAAC  
 R196A reverse: 5'GTTTCCAGAACCACCTTGCACCTCTTT-GGCTGGATG  
 R232A forward: 5'GGCTTTGGTGGCAGCGCTGGTGGT-GGTGGATATG  
 R232A reverse: 5'CATATCCACCACCACGCGCTGCC-ACCAAAGCC  
 R284A forward: 5'GGAAATTTTGAGGGCGCAAGCTCT-GGCCCTATGG  
 R284A reverse: 5'CCATAGGGGCCAGAGCTTGCGCCTC-CAAAATTTCC

Mutant sequences then were PCR amplified to substitute an N-terminal HA epitope tag for GST. HA-hnRNP genes were cloned into the EcoRI and XhoI sites of pcDNA4/V5-His (Invitrogen) and pBABEpuro to obtain pBABEpuro-HA-hnRNP A1 WT or mutant. Retrovirus-containing supernatant was obtained by harvesting 293T cells 48 h after transfection with pBABEpuro-HA-hnRNP A1 (WT or mutant), pgagpol, and pMG2D. Insertions and mutations were confirmed by sequencing. To construct hnRNP A1 truncations from the pGEX4T1:hnRNP A1 WT template, an N-terminal HA tag, 5' EcoRI restriction site, and 3' stop codon and XhoI restriction site were added using PCR and the following primers:

HA-A1 forward:  
 5'ATGGAATTCATGTACCCCTACGACGTGCCCGACTA-CGCTCTAAGTCAGAGTCTCC  
 A1 FL reverse: 5'ATGCTCGAGTCAAAATCTTCTGCCA-CTGCC  
 A1(1-196) reverse: 5'ATGCTCGAGTCATCGACCTCTTT-GGCTGG  
 A1(1-232) reverse: 5'ATGCTCGAGTCAACGGCTGCCAC-CAAAGCC  
 A1(1-284) reverse: 5'ATGCTCGAGTCATCTGCCTCCAA-AATTTCC

HA-hnRNP genes were cloned into the EcoRI and XhoI sites of pcDNA4/V5-His (Invitrogen). Truncations were confirmed by sequencing.

**Fluorescence Microscopy.** HeLa cells were transfected on collagen-coated coverslips with 1 µg DNA using 3 µL FuGene (Roche). Cells were fixed 18 h posttransfection with 2% paraformaldehyde for 20 min at room temperature. Fixative was removed and replaced with 50 mM ammonium chloride in PBS for 20 min at room temperature. Cells were washed 3× with wash buffer (0.05% Triton X-100 in PBS) and then were permeabilized for 15 min at room temperature with Perm buffer (0.2% Triton X-100 in PBS). After blocking with 10% FCS in wash buffer for 30 min, slides were stained with primary antibodies for 1 h at room temperature in wash buffer. Cells were washed 3× before incubation with fluorophore-conjugated secondary antibodies for 1 h at room temperature in wash buffer. Cells were washed 3× before being mounted on glass slides using VectaShield mounting medium (Vector Laboratories) with DAPI. Image acquisition by epifluorescence microscopy was performed using an Axiovert 200M microscope, equipped with a 63× lens (Pan Apochromat, 1.4 NA; Carl Zeiss). Images were analyzed with SlideBook 4.2 (Intelligent Imaging Innovations Inc.) to generate 3D stacks of optical sections acquired 0.2 µm apart before nearest-neighbor deconvolution.

**BRU Incorporation.** HeLa cells grown overnight in D10 on collagen-coated coverslips were washed 3× with HBSS and placed in 100 µL cell buffer containing 2 mM bromouridine (Sigma) with 100 µL PFN buffer containing PFN and GzmA (final concentration, 1 µM). Cells were incubated for 30 min at room temperature before 300 µL cell buffer was added and were incubated at room temperature for an additional 30 min. Medium was aspirated, and cells were fixed with 2% paraformaldehyde and stained as above.

**Quantitative RT-PCR.** Total RNA was reverse transcribed using random hexamers and superscript III reverse transcriptase (Invitrogen). Quantitative RT-PCR (qRT-PCR) was performed in duplicate samples using SYBR Green FastMix (Quanta) on a BioRad CFX96. mRNA levels were normalized to *GAPDH*. Primers to amplify spliced mRNAs were chosen at neighboring

exons separated by a large intron that would not be amplified unless the intervening intron was removed by splicing. Primers to amplify unspliced transcripts were chosen in an adjacent exon and intron. Primers to amplify total RNA were chosen within a single exon. The following primers were used:

*MYC* (spliced and unspliced) forward 5'GGAGGCTATTC-TGCCCATTT  
*MYC* (spliced) reverse 5'CACCGAGTCGTAGTCGAGGT  
*MYC* (unspliced) reverse 5'GCATTCGACTCATCTCAGCA  
*MYC* (total) forward 5'TTGCCGCATCCACGAAACTT  
*MYC* (total) reverse 5'TGCAAGGAGAGCCTTTTCAGA  
*FOS* (spliced and unspliced) forward 5'TTGTGAAGACCAT-GACAGGAGG  
*FOS* (spliced) reverse 5'TCCTTTCCCTTCGGATTCTCCT  
*FOS* (unspliced) reverse 5'TTCCCAGGAAGAGTACGC-TAGA  
*FOS* (total) forward 5'TCCAGTGCCAACTTCATTCCCA  
*FOS* (total) reverse 5'TGTCATGGTCTTCACAACGCCA  
*DUSP5* (spliced and unspliced) forward 5'AATGTCAGCTA-CAGGCCAGCTT  
*DUSP5* (spliced) reverse 5'AACTCGCACTTGGATGCAT-GGT  
*DUSP5* (unspliced) reverse 5'AGCCCAGAATACCACTCA-GGAT  
*DUSP5* (total) forward 5'ATCCTGAGTGTTGCGTGGA-TGT  
*DUSP5* (total) reverse 5'AGCTGGCCTGTAGCTGACATTT  
*E2F1* (spliced and unspliced) forward 5'AGCTGGACCAC-CTGATGAAT  
*E2F1* (spliced) reverse 5'TGCAATGCTACGAAGGTCC-TGA  
*E2F1* (unspliced) reverse 5'AATCCAAGCCTCTCTAGTC-CCA  
*E2F1* (total) forward 5'TTGACCCAGGACCTCCGACAG  
*E2F1* (total) reverse 5'TGTCAGTGTCCTCGGAGAGCAG  
*JUN* forward 5'TGCGTGCGCTCTTAGAGAAACT  
*JUN* reverse 5'TCACGTGAGGTTAGTTTTGGGT  
*IFNA1* forward 5'ACCTTGATGCTCCTGGCACAAA  
*IFNA1* reverse 5'TGGTTGCCATCAAACCTCTCTCT

1. Beresford PJ, Xia Z, Greenberg AH, Lieberman J (1999) Granzyme A loading induces rapid cytolysis and a novel form of DNA damage independently of caspase activation. *Immunity* 10:585–594.
2. Beresford PJ, et al. (2001) Granzyme A activates an endoplasmic reticulum-associated caspase-independent nuclease to induce single-stranded DNA nicks. *J Biol Chem* 276:43285–43293.
3. Shi L, Yang X, Froelich CJ, Greenberg AH (2000) Purification and use of granzyme B. *Methods Enzymol* 322:125–143.
4. Aricescu AR, Lu W, Jones EY (2006) A time- and cost-efficient system for high-level protein production in mammalian cells. *Acta Crystallogr D Biol Crystallogr* 62:1243–1250.
5. Thiery J, Walch M, Jensen DK, Martinvalet D, Lieberman J (2010) Isolation of cytotoxic T cell and NK granules and purification of their effector proteins. *Curr Protoc Cell Biol* Chapter 3:Unit 3.37.
6. Mili S, Shu HJ, Zhao Y, Piñol-Roma S (2001) Distinct RNP complexes of shuttling hnRNP proteins with pre-mRNA and mRNA: Candidate intermediates in formation and export of mRNA. *Mol Cell Biol* 21:7307–7319.
7. Swanson MS, Dreyfuss G (1999) Preparation of heterogeneous nuclear ribonucleoprotein complexes. *Methods Mol Biol* 118:299–308.



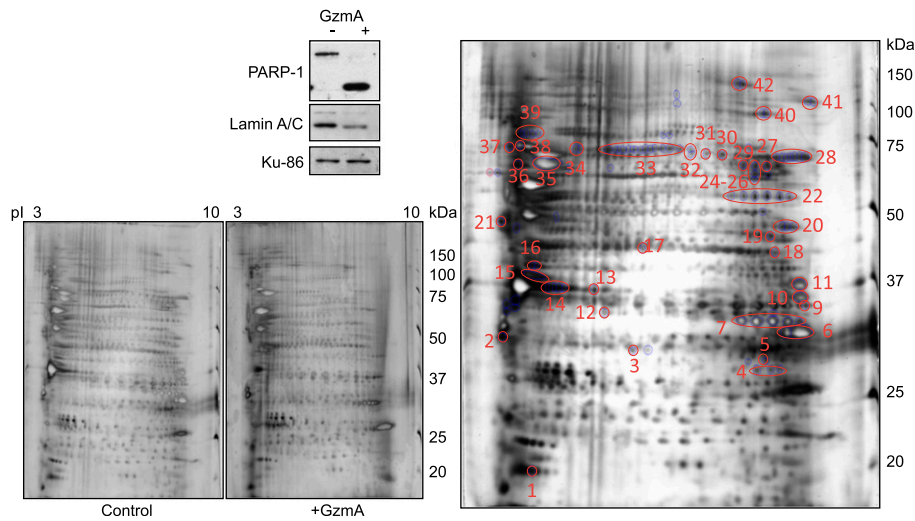

**Fig. S1.** Gels used to identify candidate nuclear Gzma substrates. K562 nuclei were treated with 1  $\mu$ M Gzma or buffer for 30 min at 37  $^{\circ}$ C, and nuclear proteins were resolved using 2D gel electrophoresis and visualized by silver staining. Gzma nuclear activity was verified by assessing cleavage of known Gzma nuclear substrates, PARP-1, and lamin A/C, by immunoblot. Ku80, which is unaffected by Gzma, was used as a loading control. Most spots are unchanged by Gzma treatment. Spots that changed in intensity at least 10-fold after Gzma treatment were grouped into 42 spots that migrated with similar apparent molecular weight that were analyzed by mass spectrometry.

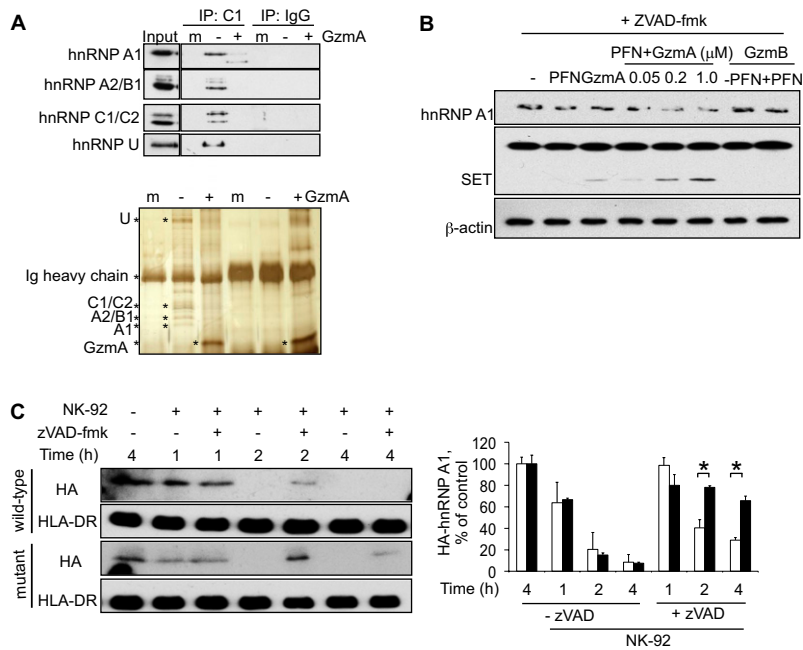

**Fig. S2.** Gzma cleaves multiple hnRNP proteins. (A) hnRNP complexes immunopurified from HeLa nuclei using anti-hnRNP C1/C2 monoclonal antibody or IgG control were mock treated or treated with 0.5  $\mu$ M Gzma for 15 min at 37  $^{\circ}$ C, and protein degradation was monitored by immunoblot (*Upper*) or silver stain (*Lower*). The presumed identity of hnRNP species, Ig heavy chain, and Gzma are denoted with asterisks. m, immunoprecipitations performed without adding ("minus") nuclear lysates. Most hnRNP protein is degraded under these conditions. (B) K562 cells were treated with PFN and/or Gzma or Gzmb at the indicated dose and time in the presence of zVAD-fmk to inhibit caspase activation. hnRNP A1 cleavage was assessed by immunoblot. Control samples were treated with buffer, PFN only, or Gzma only for 1 h. Caspase inhibition does not affect Gzma cleavage of hnRNP A1 but largely abrogates the effect of Gzmb shown in Fig. 2C. SET is a known Gzma substrate (1);  $\beta$ -actin served as loading control. (C) (*Left*) 721.221B cells, transfected to express HA-tagged WT (*Upper*) or triple-mutant (*Lower*) hnRNP A1, were left untreated or treated with zVAD-fmk and coincubated with NK-92 cells at an effector cell:target cell (E:T) ratio of 5:1 for 1–4 h. hnRNP A1 cleavage was monitored by HA-immunoblot. HLA-DR served as a loading control. A representative blot is shown. (*Right*) Quantification by densitometry (mean  $\pm$  SEM, normalized to HLA-DR and then relative to untreated cells) of three independent experiments. Statistical differences between WT and mutant hnRNP A1-expressing cells were calculated using Student's *t* test ( $*P < 0.05$ ). In this experiment, which used an E:T ratio of 5:1, hnRNP A1 cleavage in the target cell was assessed by HA-tag immunoblot of exogenously expressed HA-tagged hnRNP A1. HA-tagged hnRNP A1 became undetectable within 2 h of natural killer cell incubation unless zVAD-fmk was added to inhibit caspase activation. HA-hnRNP A1 levels declined significantly even in the presence of caspase inhibition, suggesting that both caspase-dependent and -independent cleavage of hnRNP A1 occurred.

1. Beresford PJ, Kam CM, Powers JC, Lieberman J (1997) Recombinant human granzyme A binds to two putative HLA-associated proteins and cleaves one of them. *Proc Natl Acad Sci USA* 94:9285–9290.



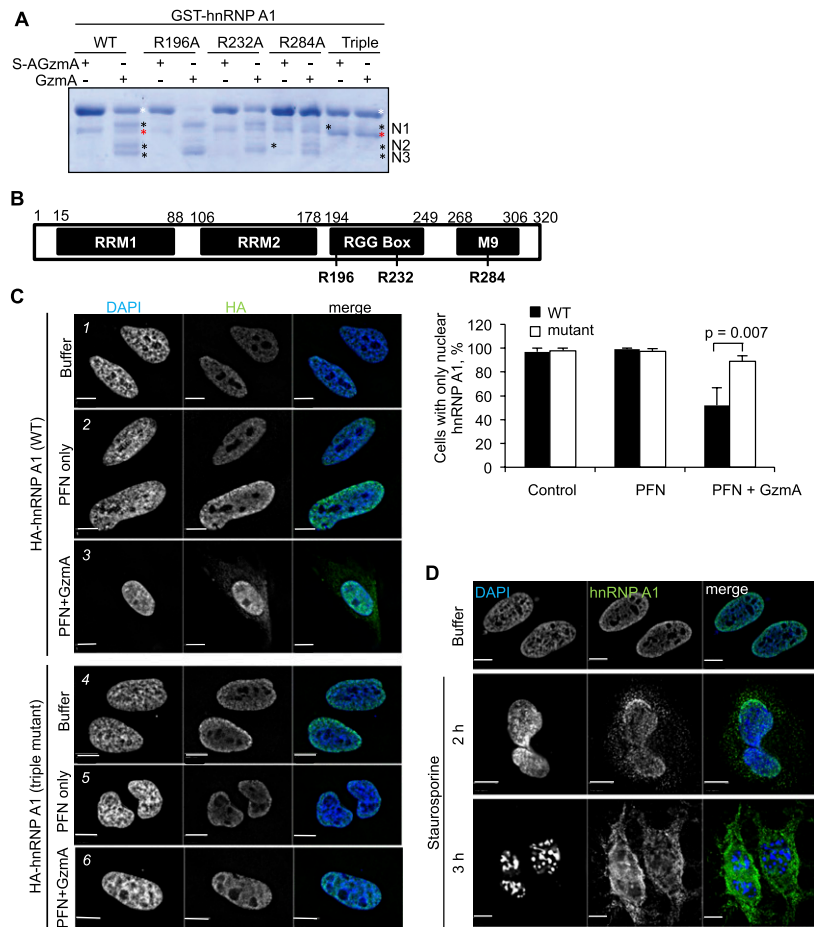

**Fig. S5.** GzmA cleaves hnRNP A1 after R196, R232, and R284, resulting in mislocalization to the cytoplasm. (A) Recombinant purified GST-hnRNP A1 (GST was added to the N terminus) was treated with 0.4  $\mu$ M GzmA or S-AGzmA for 30 min at 37  $^{\circ}$ C and examined by Coomassie blue staining. Three N-terminal cleavage products (black asterisks) appear within 10 min. Yellow asterisk indicates full-length GST-hnRNP A1; red asterisk indicates a contaminating band. Peptide sequencing of these N-terminal fragments after in-gel chymotrypsin digestion identified cleavage after R196, R232, and R284. Single-point mutants (R196A, R232A, or R284A) and a triple-point mutant (R196/232/284A) of GST-hnRNP A1 also were treated with GzmA or S-AGzmA. The triple mutant was resistant to GzmA. (B) Domain structure of hnRNP A1 indicating GzmA cleavage sites. M9, nuclear localization signal; RGG, Arg-Gly-Gly-rich region; RRM, RNA recognition motif. (C) (Left) HeLa cells transfected with WT (panels 1–3) or uncleavable mutant (panels 4–6) of HA-hnRNP A1 were treated with buffer, PFN, and/or 1  $\mu$ M GzmA for 1 h and stained for HA (green) and DAPI (blue). (Scale bars, 10  $\mu$ m.) (Right) Quantitative analysis of proportion of cells without detectable cytoplasmic HA-hnRNP A1. Data shown are mean  $\pm$  SD for three independent experiments. (D) Immunofluorescence localization of endogenous hnRNP A1 after staurosporine treatment. Untransfected HeLa cells were treated with 1  $\mu$ M staurosporine for the indicated time and stained for hnRNP A1 (green) and DAPI (blue).

**Table S1. GzmA candidate nuclear substrates identified by 2D differential proteomics**

| Name  | Other names                                          | MW    | pI   | Spot | Spot MW/pI | Peptides | % coverage |
|-------|------------------------------------------------------|-------|------|------|------------|----------|------------|
| AURKB | Aurora/IPL1-related kinase 2                         | 39.3  | 9.4  | 11   | 37.8/9     | 9        | 24.1       |
| DCJ11 | DNAJ homolog subfamily c member 11                   | 63.3  | 8.5  | 25   | 69.2/7.5   | 3        | 6.4        |
| DDX17 | p72                                                  | 72.4  | 8.8  | 23   | 68.7/8     | 10       | 13.2       |
| DDX21 | GU                                                   | 87.3  | 9.3  | 29   | 72.5/7     | 3        | 3.8        |
| DDX41 |                                                      | 69.8  | 6.8  | 33   | 81/6       | 5        | 9.5        |
| DDX5  | p68                                                  | 69.1  | 9.1  | 27   | 73.1/8     | 23       | 37         |
| DNL3  | DNA ligase 3, LIG3                                   | 102.7 | 9.0  | 40   | 97/8       | 4        | 4.4        |
| ELAV1 | HuR                                                  | 36.1  | 9.2  | 6    | 28.5/9     | 11       | 31.3       |
| FIP1  | Pre-mRNA 3'-end-processing factor FIP1               | 66.5  | 5.4  | 37   | 80.7/3.5   | 3        | 6.7        |
| FUS   |                                                      | 53.4  | 9.4  | 23   | 68.7/8     | 5        | 8.6        |
| HNRCL | hnRNP C-like 1                                       | 32.1  | 4.9  | 15   | 38.9/4.2   | 11       | 25.9       |
| HNRPC | hnRNP C1/C2                                          | 33.7  | 5.0  | 16   | 41.1/4.2   | 8        | 27.1       |
| HNRPD | hnRNP D0/hnRNP D                                     | 38.4  | 7.6  | 17   | 45.4/6     | 3        | 9          |
| HNRPG | hnRNP G                                              | 42.3  | 10.1 | 18   | 44/8.5     | 8        | 19.9       |
| HNRPL | hnRNP L                                              | 60.2  | 6.7  | 29   | 72.5/7     | 8        | 17.9       |
| HNRPM | hnRNP M                                              | 77.4  | 8.9  | 31   | 77.7/6.2   | 39       | 36.9       |
| HNRPQ | hnRNP Q                                              | 69.6  | 8.6  | 33   | 81/6       | 3        | 4.5        |
| HNRPU | hnRNP U                                              | 90.5  | 6.0  | 41   | 104/9.5    | 7        | 12.6       |
| HS71L | HSP70 like protein 1                                 | 70.4  | 6.0  | 35   | 74/4.8     | 3        | 5.1        |
| IMB1  | Importin beta-1 subunit (Importin 90)                | 97.2  | 4.7  | 38   | 82/3.5     | 4        | 7.5        |
| LMNA  | Lamin A/C                                            | 74.1  | 6.6  | 33   | 81/6       | 47       | 57.8       |
| LMNB1 | Lamin B1                                             | 66.4  | 5.2  | 35   | 74/4.8     | 67       | 66         |
| LMNB2 | Lamin B2                                             | 67.7  | 5.4  | 35   | 74/4.8     | 7        | 12.7       |
| NKRF  | NFκB-repressing factor                               | 77.7  | 8.9  | 40   | 97/8       | 5        | 7          |
| NOLC1 | Nucleolar phosphoprotein p130, NOPP140               | 73.7  | 9.5  | 42   | 115/7      | 7        | 10         |
| NONO  | p54nrb                                               | 54.2  | 9.0  | 22   | 60/8       | 10       | 23.8       |
| NPM   | Nucleophosmin                                        | 32.6  | 4.6  | 13   | 33.2/5.5   | 6        | 24.5       |
| NUCL  | Nucleolin                                            | 76.5  | 4.6  | 31   | 77.7/6.2   | 3        | 4.7        |
| NUP37 | Nucleoporin NUP37                                    | 36.7  | 5.6  | 13   | 33.2/5.5   | 3        | 11         |
| NUPL2 | Nucleoporin-like 2, NLP-1, HCG1                      | 44.9  | 9.3  | 18   | 44/8.5     | 4        | 11.1       |
| PHB2  | Prohibitin-2                                         | 33.3  | 9.8  | 7    | 30/8       | 10       | 33.1       |
| PININ |                                                      | 81.5  | 6.8  | 42   | 115/7      | 5        | 6.1        |
| ROA1  | hnRNP A1                                             | 38.7  | 9.3  | 6    | 28.5/9     | 13       | 36.9       |
| ROA2  | hnRNP A2/B1                                          | 37.4  | 9.0  | 7    | 30/8       | 22       | 54.5       |
| ROA3  | hnRNP A3                                             | 40    | 9.1  | 11   | 37.8/9     | 9        | 21.4       |
| ROA0  | hnRNP A0                                             | 30.8  | 9.3  | 8    | 31.7/8     | 3        | 16.7       |
| SF3B4 | Splicing factor 3b subunit 4                         | 44.4  | 8.6  | 19   | 48.2/8.2   | 3        | 12.7       |
| SFPQ  | H-splicing factor, PSF                               | 76.1  | 9.5  | 40   | 97/8       | 17       | 17.3       |
| SFRS1 | SF2, ASF-1                                           | 27.6  | 10.4 | 5    | 23.7/8     | 5        | 20.2       |
| THOC1 | THO complex subunit 1, THO1                          | 75.7  | 4.9  | 39   | 88.5/4     | 5        | 9.1        |
| U551  | 116 kDa U5 small nuclear ribonucleoprotein component | 109.5 | 4.8  | 39   | 88.5/4     | 3        | 3.4        |
| UTP18 | U3 small nucleolar RNA-associated protein 18         | 62    | 8.9  | 29   | 72.5/7     | 6        | 13.8       |
| WDR18 | WD repeat protein 18                                 | 47.4  | 6.2  | 17   | 45.4/6     | 8        | 21.8       |
| ZN326 | Zinc finger protein 326                              | 65.7  | 5.1  | 34   | 80.7/5.2   | 6        | 11.2       |

The calculated molecular weight (MW) and isoelectric point (pI) are compared with their values from the GzmA-untreated 2D gel (Fig. S1). The number of peptides identified by mass spectrometry and their coverage of the protein are given. Hits were required to have at least three peptides, to be localized to the nucleus, and to be predicted to migrate roughly like the spot from which they were retrieved. MW, molecular weight.

#### Dataset S1. Summary of mass spectrometry results

##### [Dataset S1](#)

All proteins recovered by at least three peptides are shown.
